# Supplementary material for: Epithelial cell chirality emerges through the dynamic concentric pattern of actomyosin cytoskeleton
Source: eLife journal article supplement (doi:10.7554/elife.102296), 2025-07-08
Supplement: fig2-figsupp2-data1 [file elife-102296-fig2-figsupp2-data1-v2.pdf]

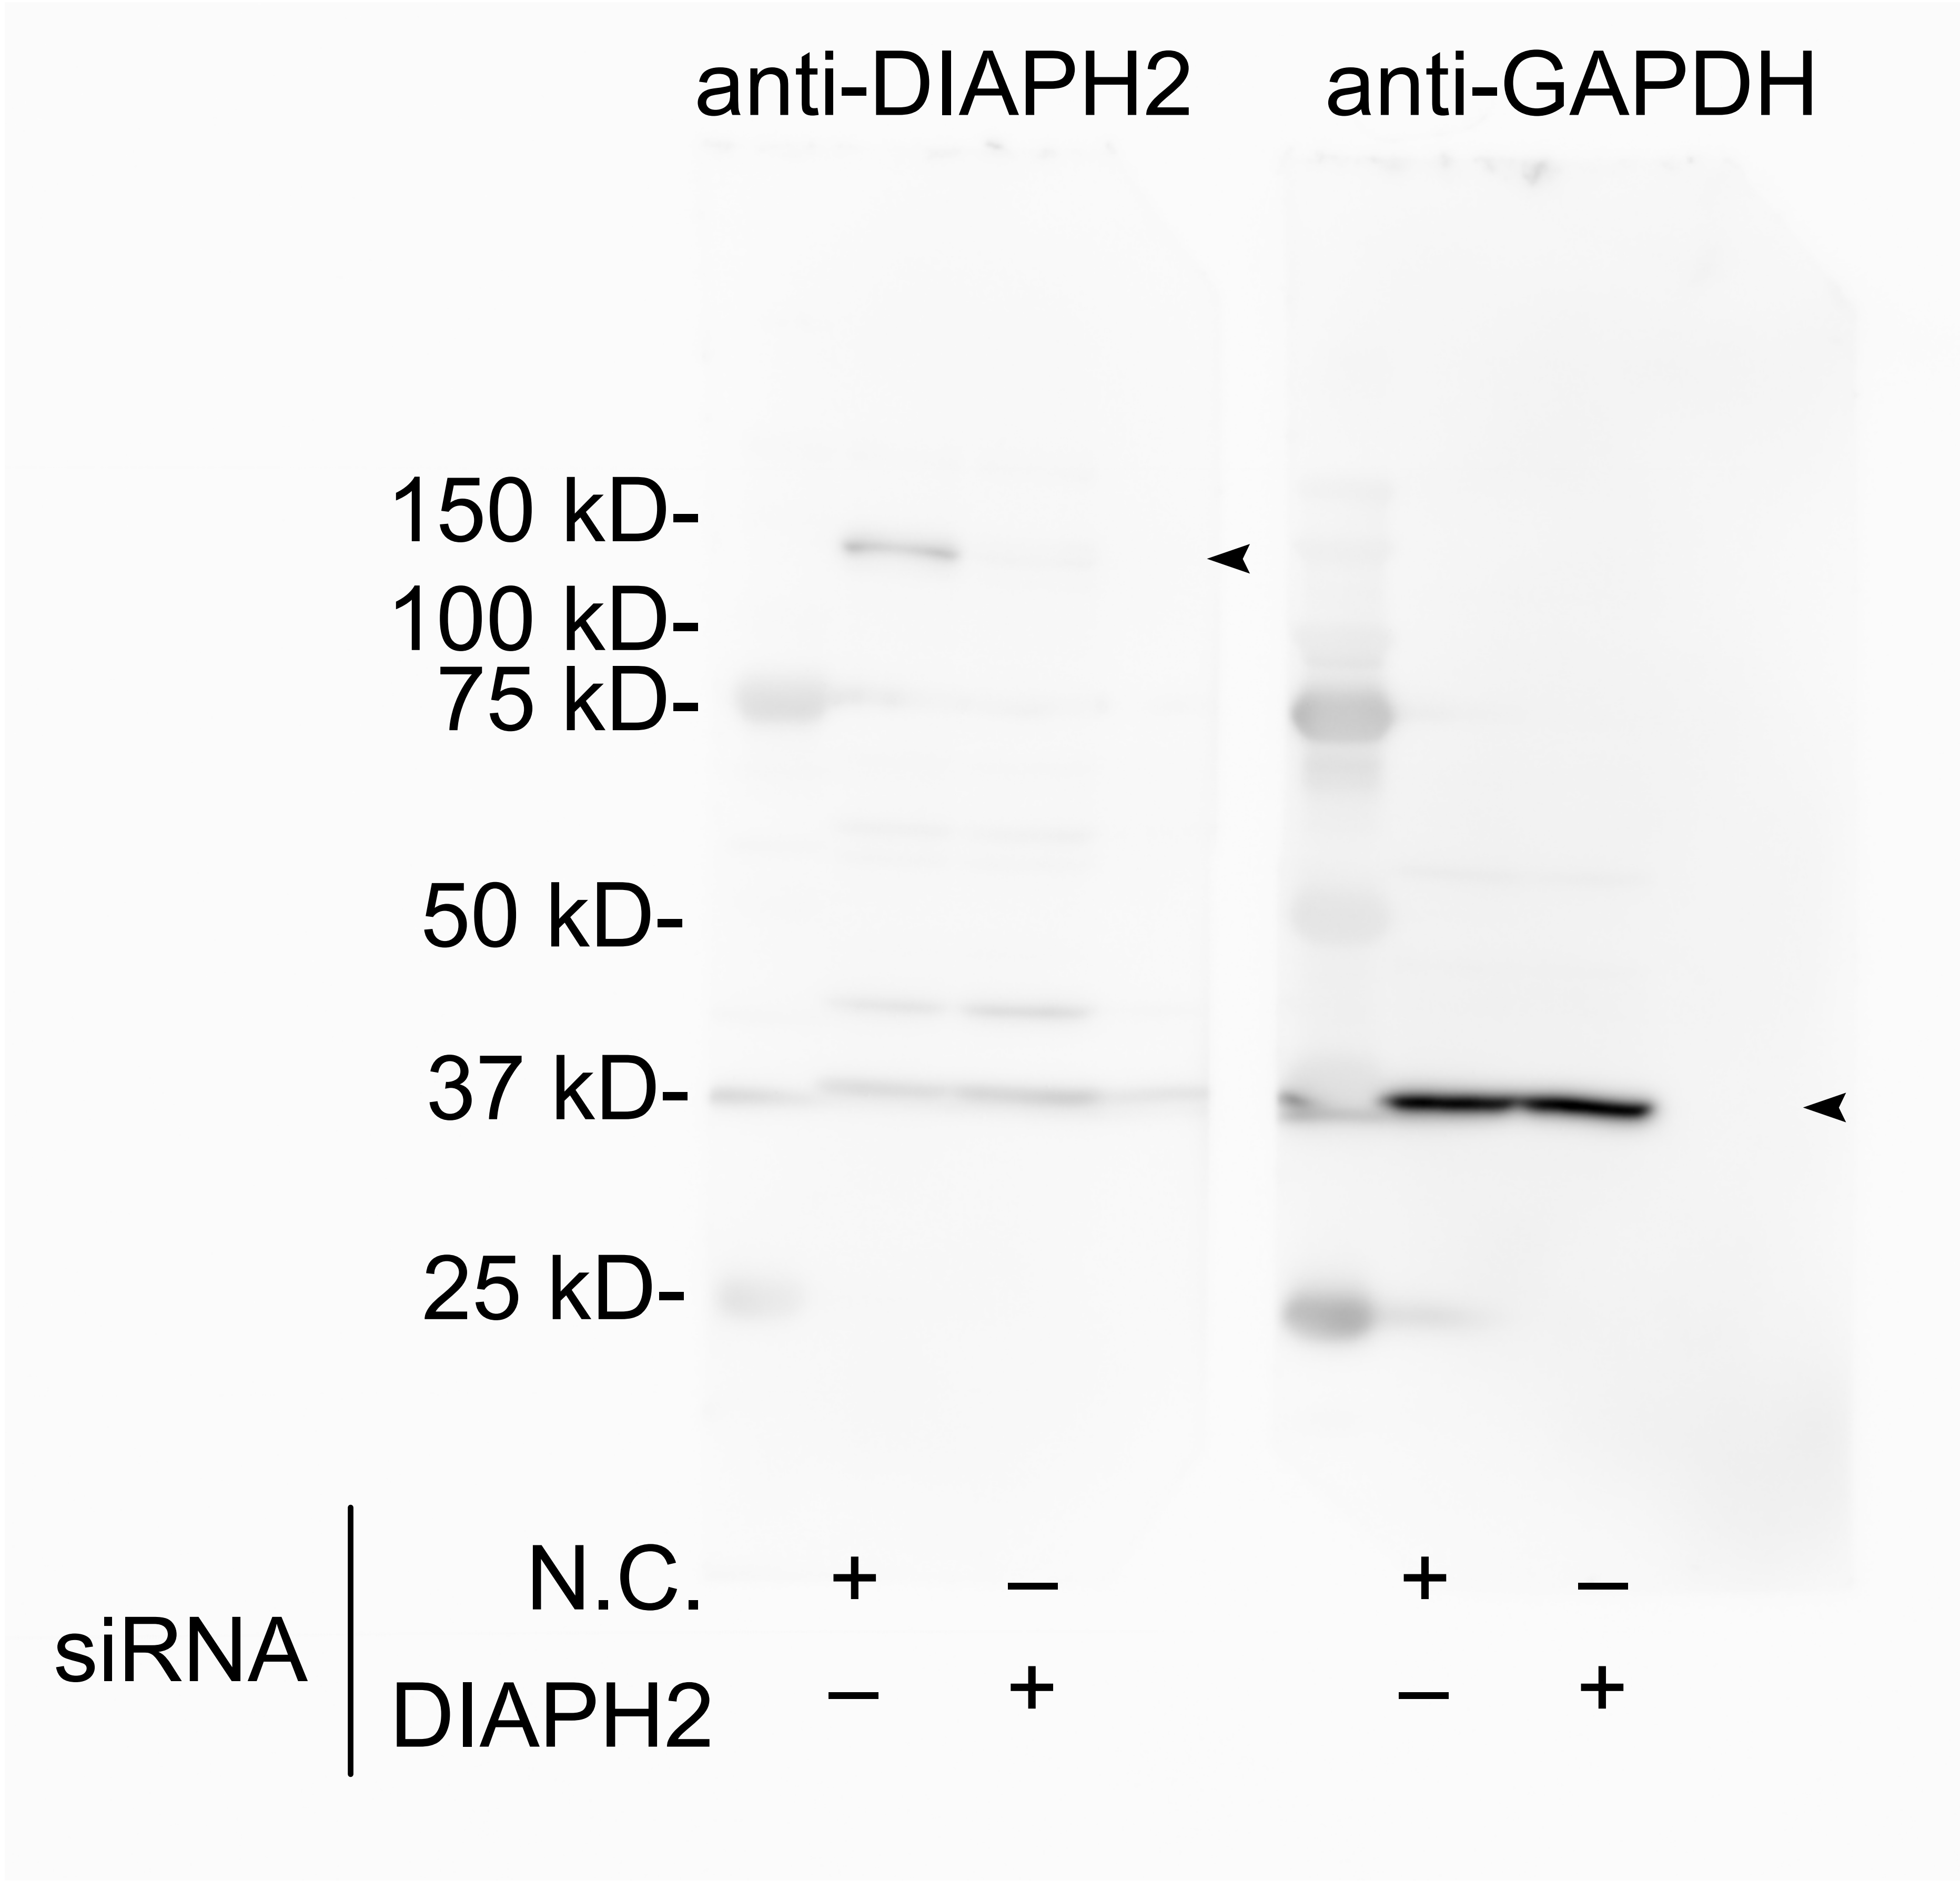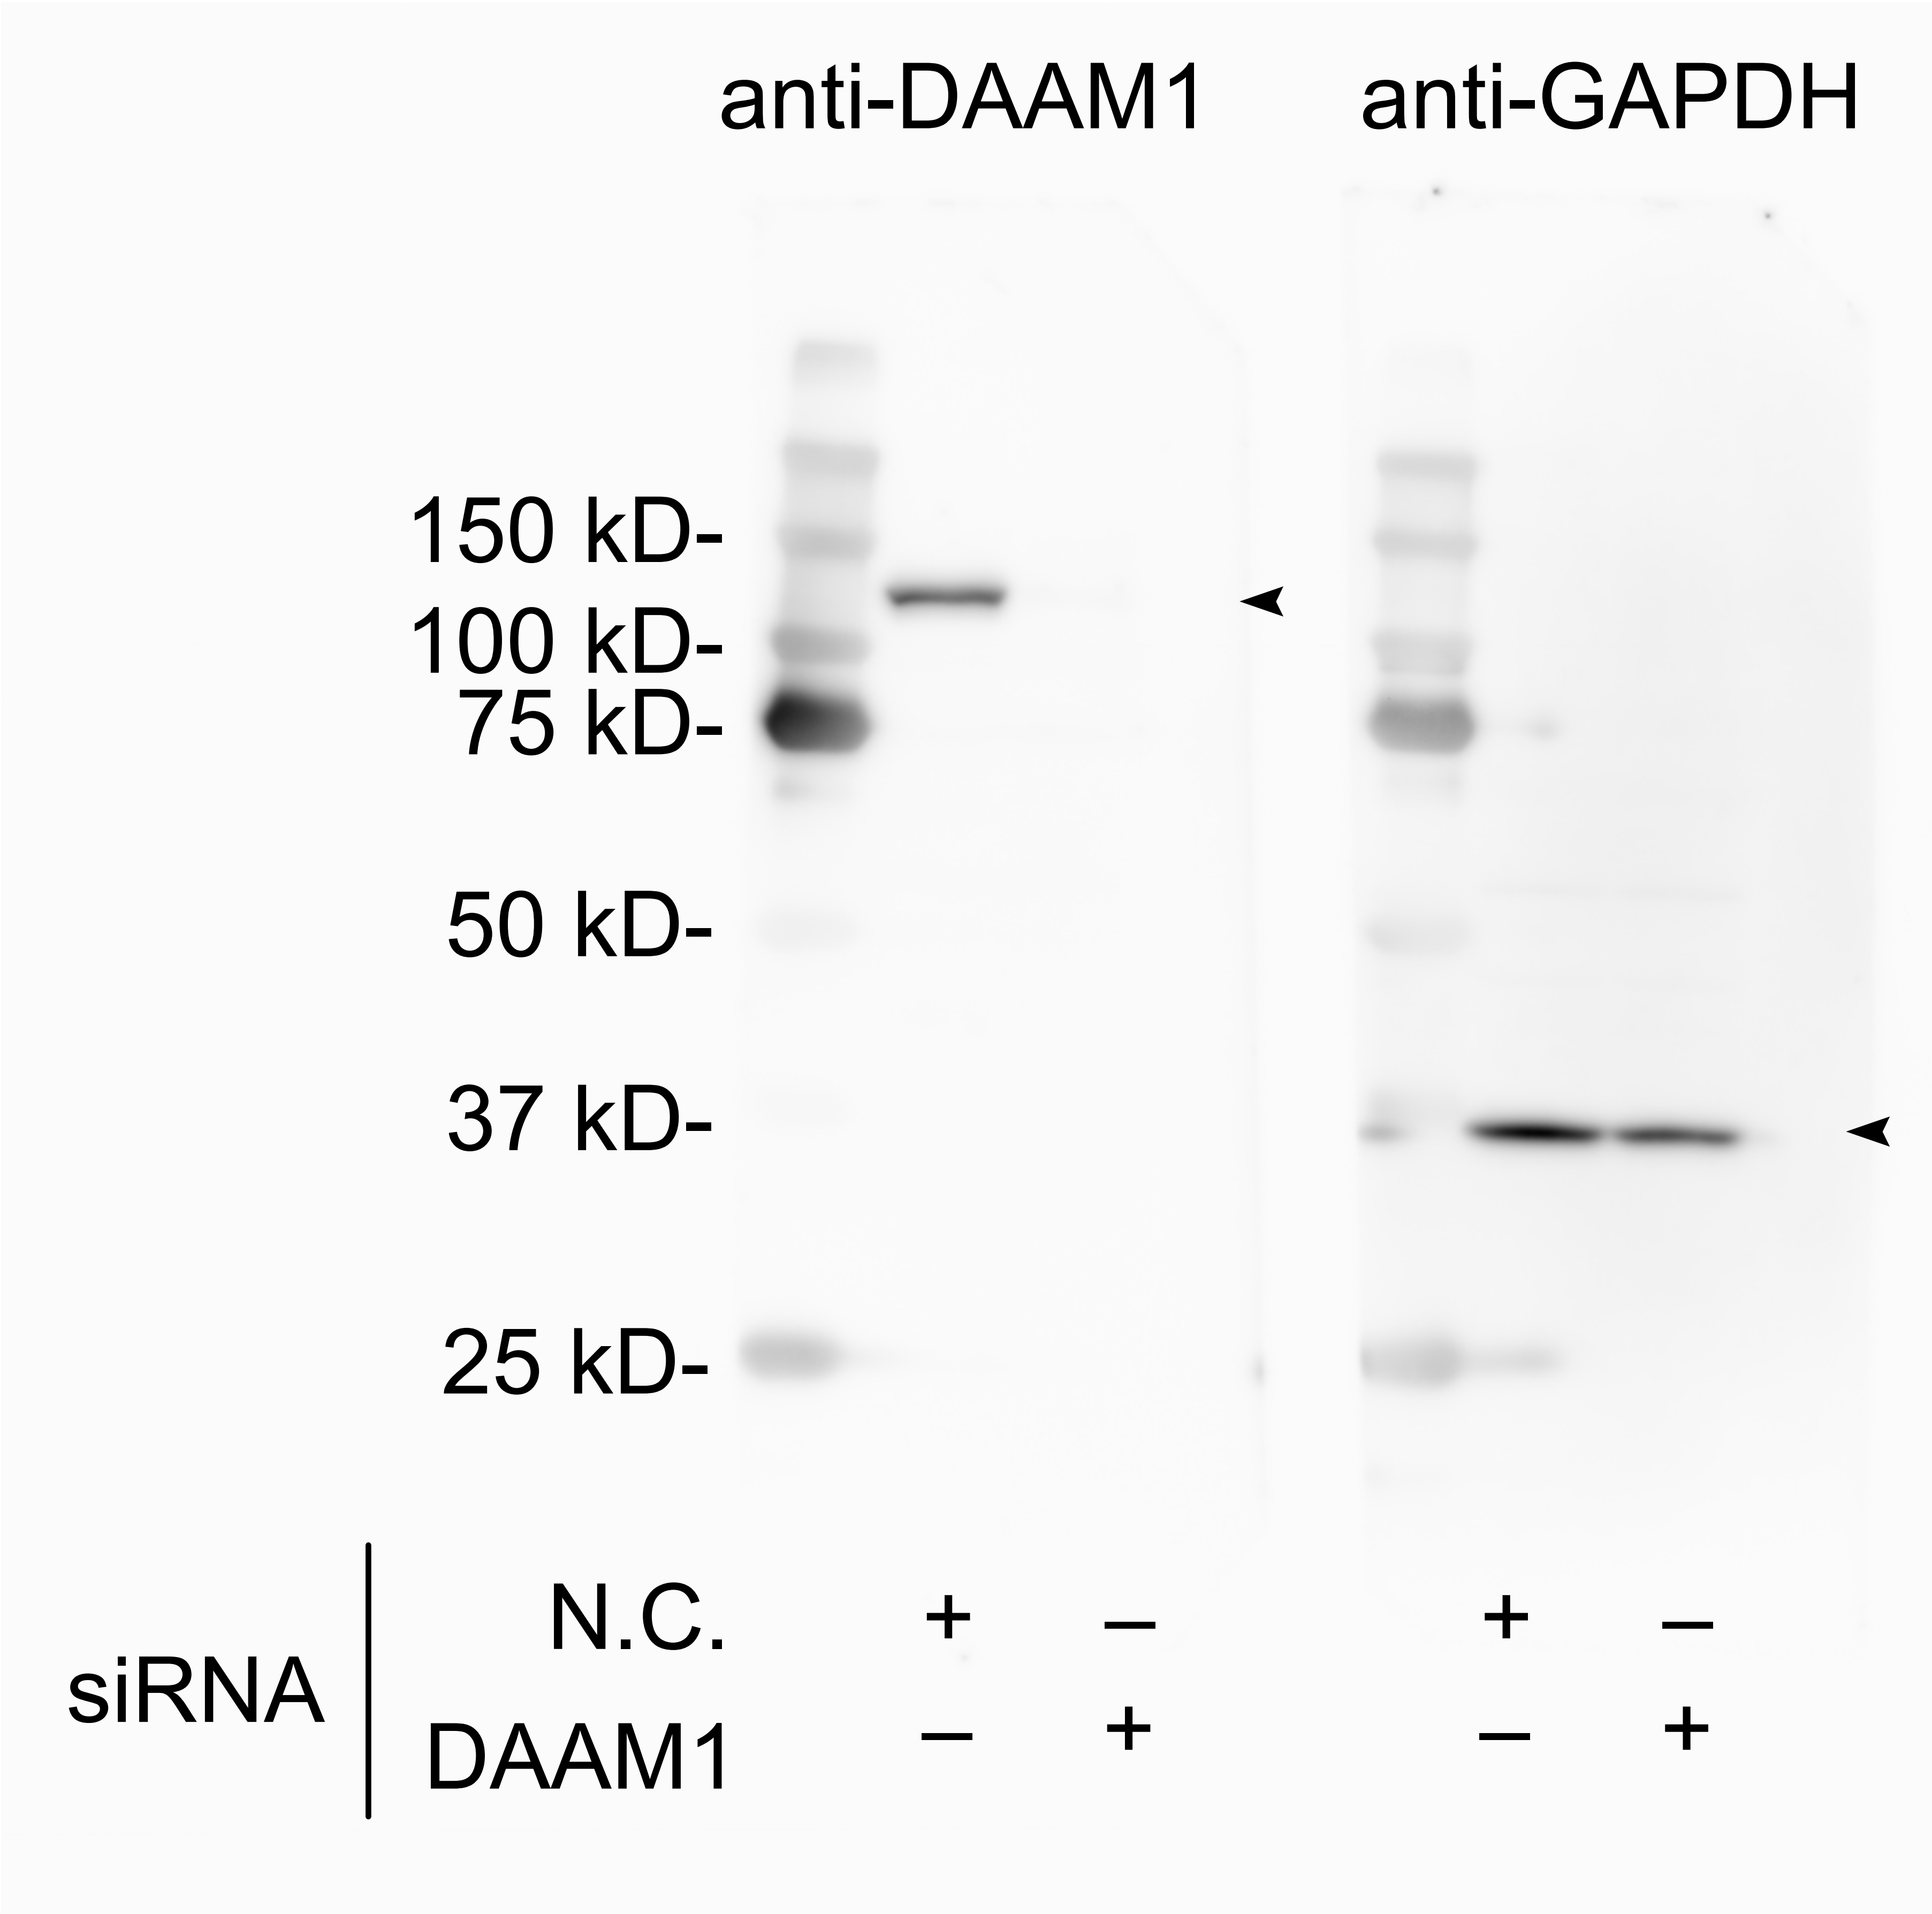

**Figure 2 – figure supplement 2, Source Data 1.** Original membranes corresponding to Figure2 – figure supplement 2B and C. siRNA treatments are indicated below each lane. Arrowheads mark the bands of interest. these bands are shown with contrast adjustment in Figure 2—figure supplement 2B–C.
